# Supplementary material
Source: Research Square preprint supplement (doi:10.21203/rs.3.rs-10189330/v1)
Supplement: Supplementary file 1 [file 913b12ea4109bb48c7a7d174.docx]

**Data Extraction and Quality Assessment**

| **Study (Author, Year)** | **Study design** | **Sampling representativeness** | **Analytical transparency** | **Seasonal coverage** | **COI disclosure** | **Overall quality rating & notes** |
| --- | --- | --- | --- | --- | --- | --- |
| Banza Lubaba Nkulu et al. (2009) Environ. Res. | Field biomonitor. | ✓ 351 subjects; 6 mining + 4 control communities | ✓ ICP-MS; LOD reported | ~ Single wet season sampling | ✓ Declared (KU Leuven) | HIGH — largest DRC biomonitoring dataset; limited by single-season sampling |
| Cheyns et al. (2014) Sci. Total Environ. | Field + dietary survey | ✓ 6 mining areas; 2 residential + 1 control per site | ✓ ICP-MS and ICP-OES; cross-border protocol | ~ Two seasons not differentiated | ✓ Declared (KU Leuven / ENABEL) | HIGH — cross-border design; dietary and water data combined |
| Cheyns et al. (2021) Environ. Advances | Field water quality | ✓ DRC + Zambia cross-border; river network | ✓ ICP-OES and ICP-MS; blanks/duplicates | ~ Dry season only | ✓ Declared | HIGH — most comprehensive Copperbelt cross-border water dataset available |
| Atibu et al. (2018) Chemosphere | Field water quality | ✓ 3 rivers; 12 stations; AMD and non-AMD reaches | ✓ ICP-MS; recovery rates 95–107% | ✓ Wet and dry season sampling | ✓ Declared | HIGH — only DRC study with wet/dry seasonal AMD comparison; strong analytical protocol |
| Muimba-Kankolongo et al. (2023) Agronomy | Field soil + water | ✓ Lubumbashi urban gardens; mining + control | ✓ ICP-OES; certified reference material used | ~ Dry season only; 2022 samples | ✓ Declared | HIGH — most recent (2023) soil/irrigation data; limited by single season |
| Kalenga et al. (2019) J. Cleaner Prod. | Document review + field | ~ Copperbelt-wide; some sites unverified | ✓ Leaching tests (TCLP); mineralogy (XRD) | ~ No seasonal analysis for leachate | ✓ Declared (UNIKOL) | MODERATE — unique tailings inventory data; spatial coverage not fully verified |
| Malamba-Lez et al. (2021) Int. J. Environ. Res. Public Health | Case-control | ✓ 90 cases, 120 controls; Katanga hospital | ✓ AAS; whole blood metal analysis | ~ Cross-sectional; season not stated | ✓ Declared | HIGH — only published DRC study linking metal exposure to specific cardiovascular disease |
| Nkulu et al. (2018) Nature Sustainability | Field biomonitor. | ✓ Kolwezi Kasulo neighbourhood; child/adult | ✓ ICP-MS; urinary cobalt; 8-OHdG | ~ Single sampling campaign | ✓ Declared (KU Leuven) | HIGH — landmark DRC cobalt child exposure study; high citation impact |
| Gomes & Valente (2024) Environ. Sci. Pollut. Res. | Field water quality (AMD) | ✓ Iberian Pyrite Belt; AMD hotspot; 8 stations | ✓ ICP-MS; pH/EC in situ; seasonal comparison | ✓ 4 seasonal campaigns (monthly) | ✓ Declared | HIGH — strongest AMD seasonal dataset used in this review; non-DRC but geochemically analogous |
| Elghali et al. (2021) Chem. Geology | Lab column experiment | ~ Single tailings site (Quebec); 10-year data | ✓ Sequential extraction; ICP; XRD | ✓ Annual monitoring columns | ✓ Declared | HIGH — unique long-term pyrite oxidation kinetic data; limited geographic generalisability |
| Dold (2014) Environ. Sci. Technol. | Field + lab | ✓ Multiple sulfide mine sites | ✓ Geochemical modelling; EH-pH diagrams | ~ Snapshot samples; no seasonal analysis | ✓ Declared | HIGH — foundational biogeochemical AMD mechanisms paper |
| Evangelou & Zhang (1995) Crit. Rev. Environ. Sci. Tech. | Literature review | ✓ multi-site synthesis | ✓ Thermodynamic and kinetic data compiled | ✗ Not applicable (review) | ✓ Declared | HIGH — foundational review; not a primary study; no sampling bias applicable |
| Pandis et al. (2022) ChemEngineering | Literature review (AOP) | ✓ Global AOP literature synthesis | ✓ All cited sources peer-reviewed | ✗ Not applicable | ✓ Declared | MODERATE — recent AOP review; no DRC-specific data |
| Skousen et al. (2019) Mine Water Environ. | Literature review | ✓ Global passive treatment case studies | ✓ Consistent treatment performance metrics | ~ Seasonal data varies by study | ✓ Declared | MODERATE — relevant to treatment section; limited DRC applicability discussion |
| Franks et al. (2014) PNAS | Survey + interview | ✓ 45 interviews; 50 mining conflict cases | ✓ Structured interview protocol | ✗ Not applicable (governance) | ✓ Declared (UQ) | HIGH — PNAS; highest-impact governance study cited; no DRC-specific fieldwork |
| Mancini et al. (2021) Resour. Conserv. Recycl. | Policy analysis | ✓ Global cobalt supply chain review | ✓ Publicly available supply chain data | ✗ Not applicable | ✓ Declared | MODERATE — relevant to governance/circular economy section |
| Teschke & Xuan (2025) Int. J. Mol. Sci. | Review (toxicology) | ✓ Comprehensive toxicology database review | ✓ All major metals covered; WHO thresholds cited | ✗ Not applicable | ✓ Open access; no COI stated | HIGH — most recent (2025) clinical toxicology reference; open access PMC |
| Schwartz et al. (2021) GeoHealth | Systematic review | ✓ Global ASM health review; DRC included | ✓ PRISMA-compliant; data extraction table | ~ Pooled from heterogeneous primary studies | ✓ Declared | HIGH — strongest systematic review on ASM child health; open access PMC |
